# Supplementary material for: Preparation and characterization of macrophage membrane camouflaged cubosomes as a stabilized and immune evasive biomimetic nano-DDS
Source: Royal Society of Chemistry journal article supplement (doi:10.1039/d4tb01063a), 2024-01-01
Supplement: d4tb01063a1.pdf [file d4tb01063a1.pdf]

1 **Preparation and characterization of macrophage membrane**  
2 **camouflaged cubosomes as a stabilized and immune evasive**  
3 **biomimetic nano-DDS**

4

5

**Supplementary Information**

6

7 **Xuehui Rui,<sup>\*a</sup> Yukihiro Okamoto,<sup>a</sup> Nozomi Morishita Watanabe,<sup>a</sup> Taro Shimizu,<sup>b</sup> Ward**  
8 **Wakileh,<sup>a</sup> Naoko Kajimura<sup>c</sup> and Hiroshi Umakoshi<sup>\*a</sup>**

9

---

\* Corresponding authors

a. Division of Chemical Engineering, Graduate School of Engineering Science, Osaka University, 1-3 Machikaneyamacho, Toyonaka, Osaka 560-8531, Japan

E-mail: [xuehui.rui@cheng.es.osaka-u.ac.jp](mailto:xuehui.rui@cheng.es.osaka-u.ac.jp), [umakoshi.hiroshi.es@osaka-u.ac.jp](mailto:umakoshi.hiroshi.es@osaka-u.ac.jp),

b. Research Institute for Microbial Diseases, Osaka University, 3-1 Yamadaoka, Suita, Osaka 565-0871, Japan

c. Research Center for Ultra-High Voltage Electron Microscopy, Osaka University, 7-1, Mihogaoka, Ibaraki, Osaka 567-0047, Japan

10 **Content**

11 **1. Chemical structures of CB ingredients**

12 **2. Summary of previous studies about CBs surface modification**

13 **3. Cell membrane protein/phospholipid Quantification**

14 **4. MTT assay result**

15 **5. Colon26 internalization efficacy investigation using CLSM**

16 **6. Mouse plasma preparation**

17 **7. Biodistribution study results**

18 **8. DOX encapsulation efficacy investigation**

19 **9. Additional SAXS investigation results**

20

21 **1. Chemical structures of CB ingredients**

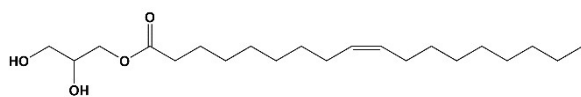

**Monoolein**

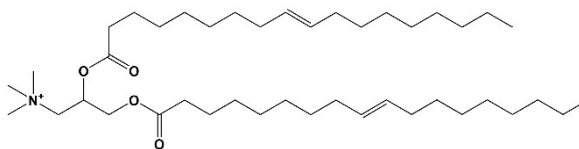

**DOTAP**

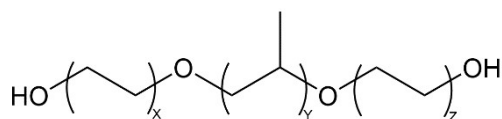

**Pluronic F127**

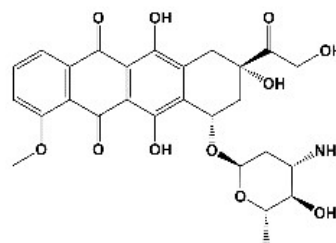

**Doxorubicin**

**Figure S-1. Chemical structures of CB ingredients used in this study.**

## 23 2. Summary of previous studies about CBs surface modification

24 Table. S-1 Previous studies about CBs surface modification

| Surface Modifier | Modification Material        | Function                                                           | Ref              |
|------------------|------------------------------|--------------------------------------------------------------------|------------------|
| Polymer          | PEG                          | Stabilize CBs;<br>Extend the circulation timespan <i>in vivo</i> . | 1, 2, 3,<br>4, 5 |
|                  | Poly- $\epsilon$ -lysine     | Stabilize CBs in serum;<br>Sustain drug release.                   | 6                |
|                  | Chitosan                     | Sustain drug release;<br>Enhance bioavailability.                  | 7                |
|                  |                              | Enhancing the immune response for vaccines.                        | 8                |
|                  | Hyaluronic acid              | CD44 targeting ability                                             | 9                |
|                  | Biotin-based block copolymer | Active targeting                                                   | 10               |
| Protein/Peptides | Antimicrobial peptides       | Antibacterial                                                      | 11               |
|                  | Affimer                      | Cancer cell targeting                                              | 12               |
|                  | Lactoferrin                  | Cancer cell targeting                                              | 13               |
|                  | Cell-Penetrating Peptides    | Skin penetration                                                   | 14               |
|                  | Odorranalectin               | Improve brain drug delivery                                        | 15               |
| Other            | Folate                       | Tumor targeting                                                    | 16, 17           |

### 26 **3. Cell membrane protein/phospholipid quantification**

27       Extracted cell membranes were further analyzed and quantified by the membrane-associated  
28 proteins and membrane-associated phospholipids, respectively using a Pierce® BCA Protein  
29 Assay Kit and, LabAssay™ Phospholipid Kit (Fuji Film). Generally, cell membrane vesicles  
30 extracted from  $1 \times 10^8$  J774.1 contain ~1.53 mg cell membrane-related protein and ~0.21 mg  
31 phospholipid. The protein to phospholipid ratio was ~7.29.

32

### 33 **4. MTT assay result**

34       MTT assays were performed using HEK293 cells. Cells were seeded in a 96-well plate at a  
35 density of  $1 \times 10^4$  cells/well and cultured for 24 hours. After removing the medium, fresh medium  
36 containing various concentrations of CBs (0, 0.2, 0.4, 0.6, 0.8, and 1.0 mg/mL, calculated based  
37 on MO weight) was added to the wells. After 24 and 48 hours of incubation, MTT solution was  
38 added to each well at a final concentration of 0.5 mg/mL, followed by 4 hours of incubation. The  
39 96-well plates were then centrifuged at 1000 g for 5 minutes, and the medium was carefully  
40 removed before adding DMSO (100  $\mu$ L per well) to dissolve the formazan crystals. The optical  
41 density (OD) of the resulting solution was measured at 570 nm using a spectrophotometer  
42 (xMark™ Microplate Absorbance Spectrophotometer, Bio Rad, USA).

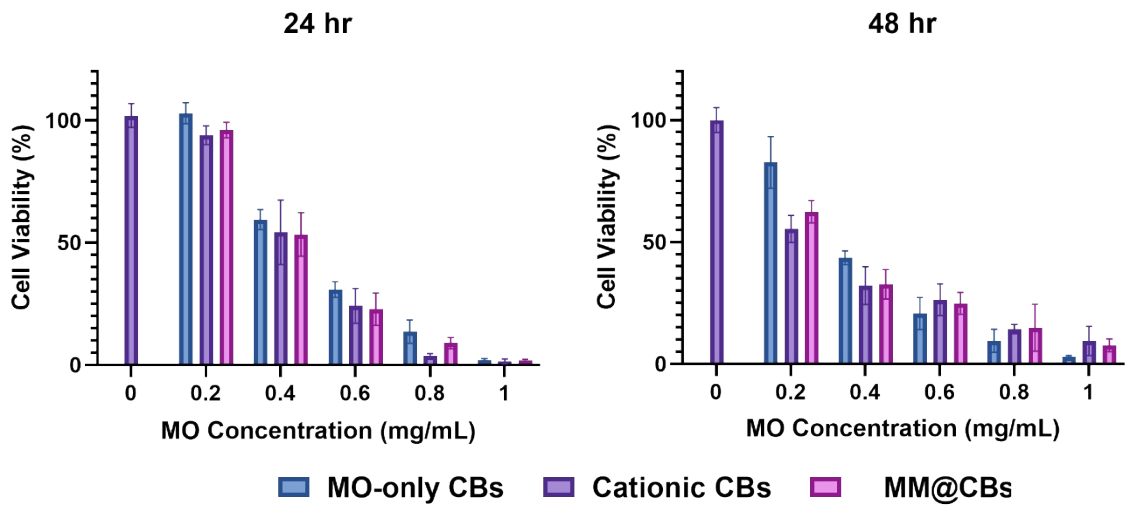

**Figure S-2. MTT Assay Results.** HEK293 cells were treated for 24/48 hours with MO-only CBs, cationic CBs, and MM@CBs at different concentrations (calculated according to the MO concentration). Error bars represent  $\pm$  s.d.  $n=3$ .

44 **5. Colon26 internalization efficacy investigation using CLSM**

45 The Colon26 internalization efficacy investigation was carried out as described in  
46 experimental section.

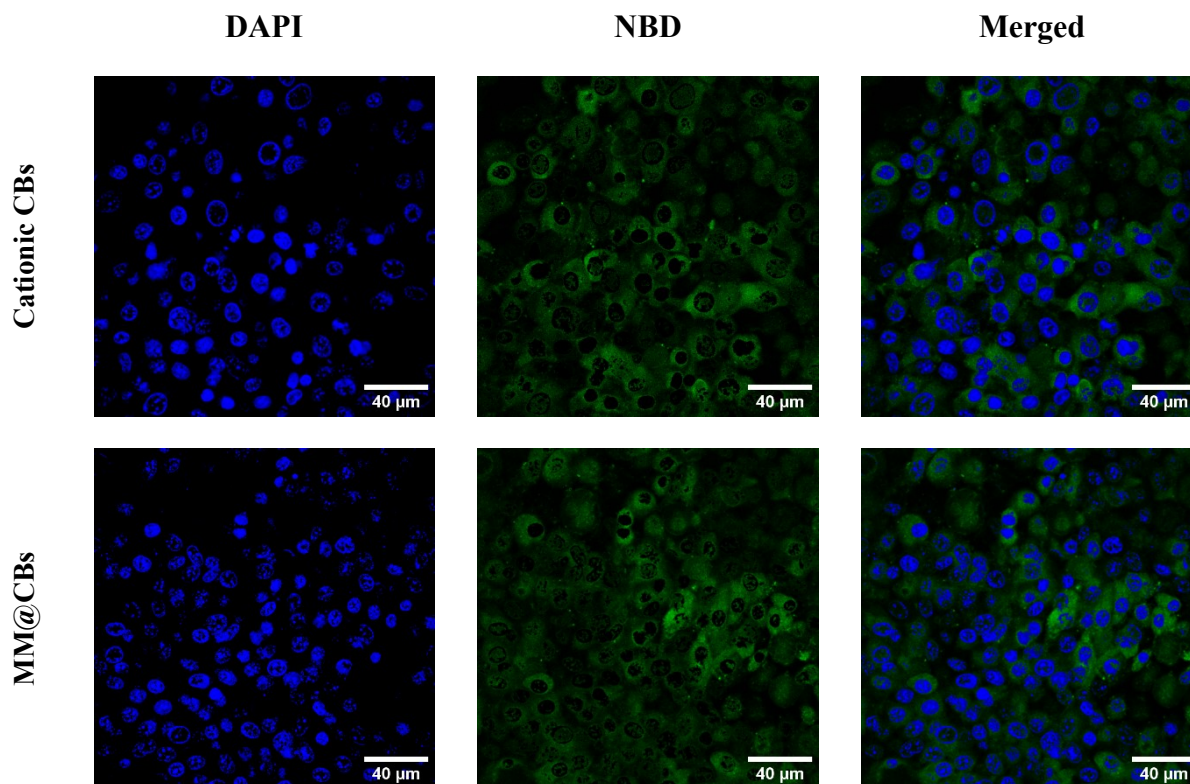

**Figure S-3. Colon26 internalization efficacy investigation.** Confocal laser scanning microscopy (CLSM) images of Colon-26 cells after 4 hours treatment with NBD-PE doped cationic CBs and MM@CBs (0.15 mg/mL MO). The three columns are corresponding to the DAPI channel, NBD channel and merged pictures respectively. Scale bar = 40 μm.

47

48

49 **6. Mouse plasma preparation**

50 Blood samples were collected from BALB/c mice via the inferior vena cava under anesthesia.  
51 Whole blood was centrifuged at 1800 g and 4°C for 15 min. The supernatant was then  
52 ultracentrifuged at 50,000 g and 4°C for 30 min. The resulting plasma was collected for further  
53 experiments.

54 For DLS and  $\zeta$ -potential analysis, 50  $\mu$ L of plasma was diluted in 1 mL of ultrapure water.  
55 The hydrodynamic diameter and  $\zeta$ -potential were measured in triplicate at 25°C. The mean  
56 hydrodynamic diameter of the mouse plasma was  $35.42 \pm 0.63$  nm, with a polydispersity index  
57 (PDI) of  $0.53 \pm 0.01$ . The  $\zeta$ -potential was  $-19.50 \pm 2.92$  mV.

58



59 7. Biodistribution study results

A

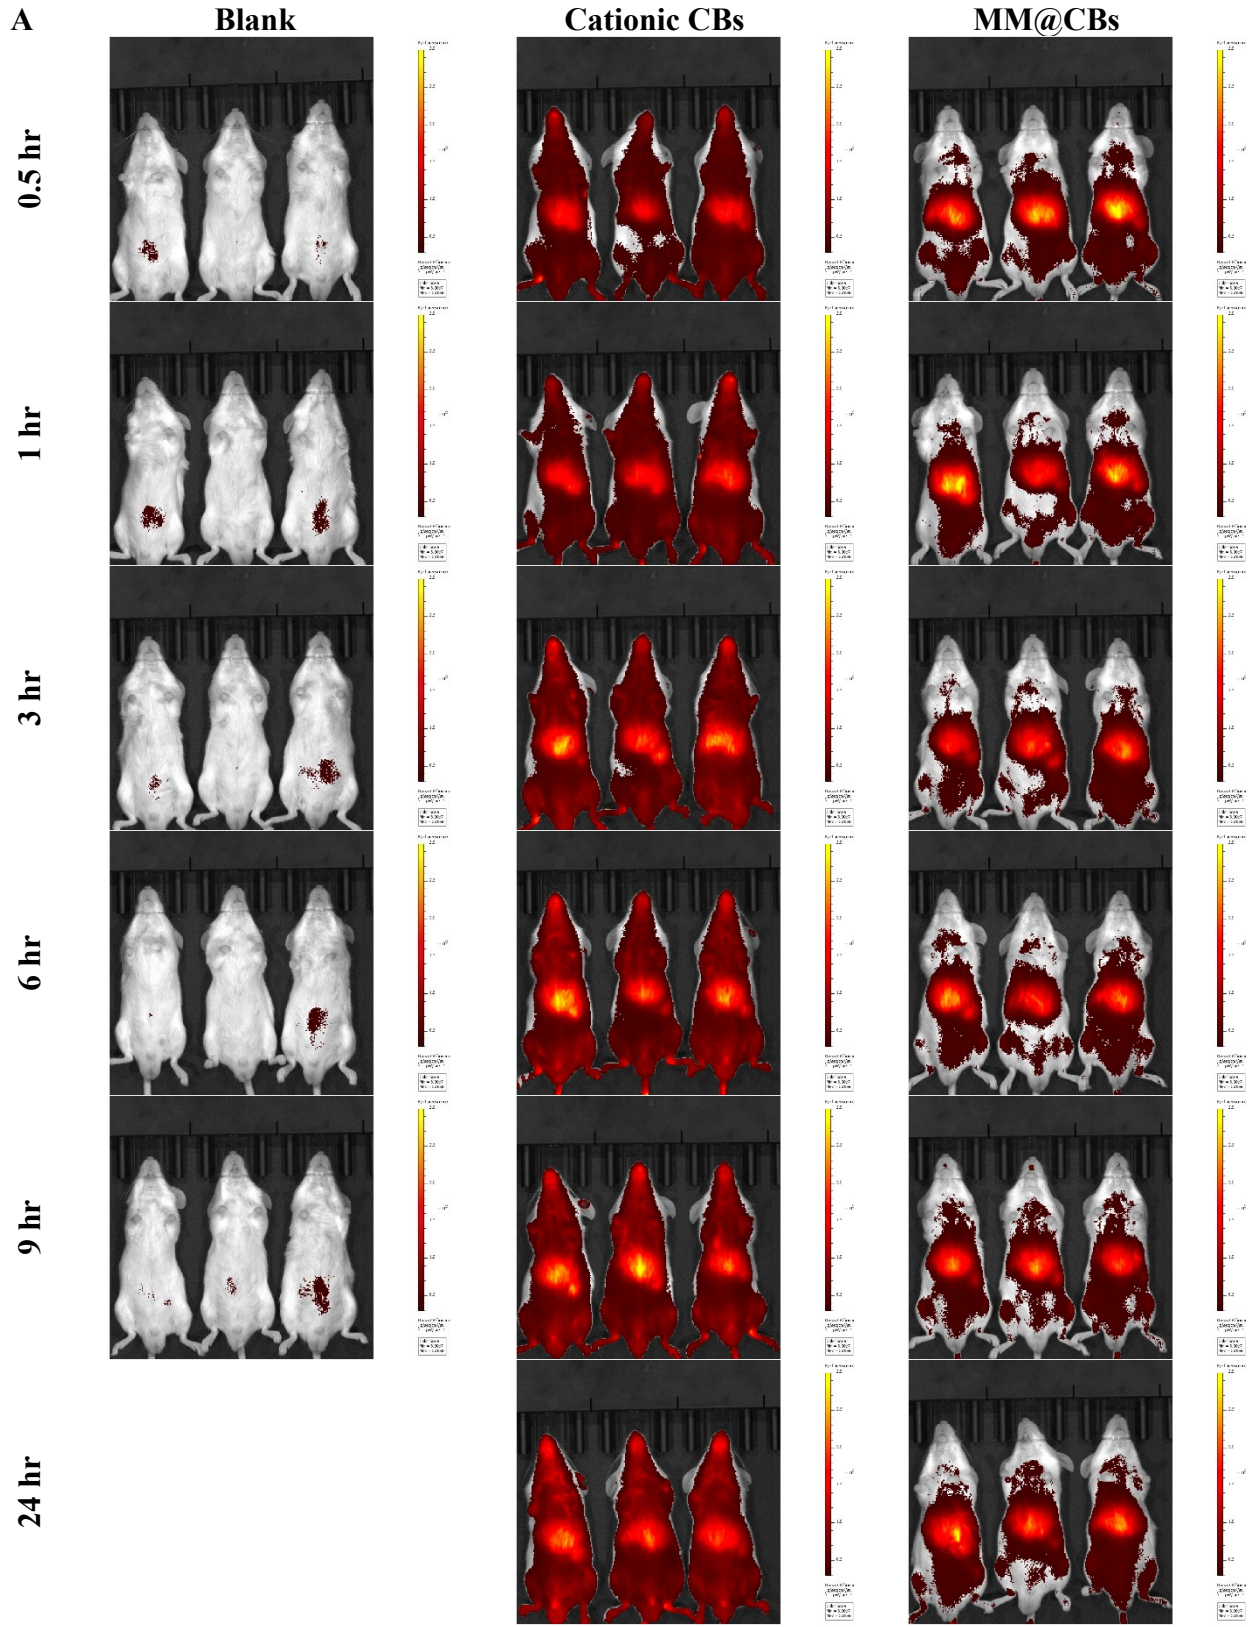

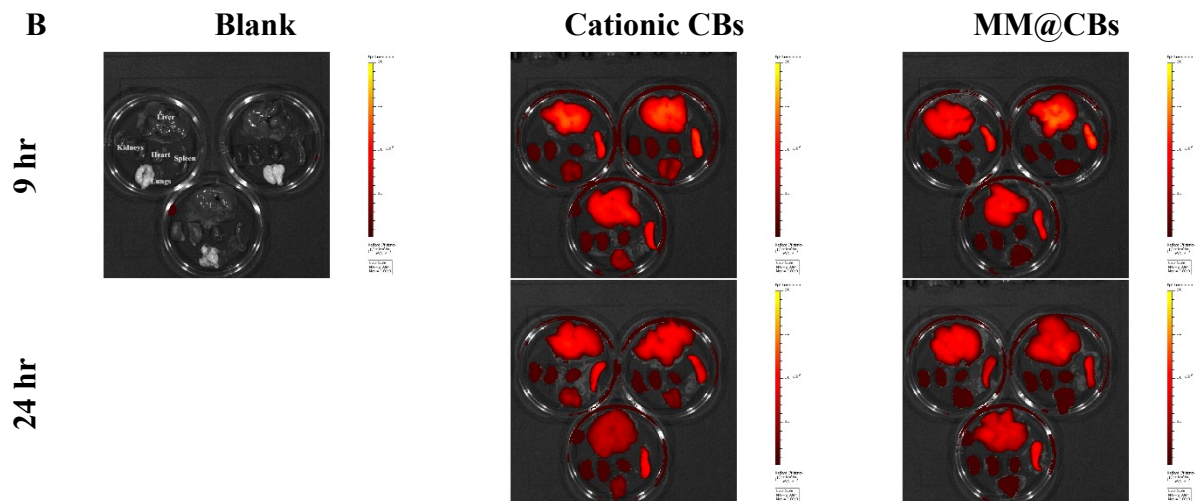

**Figure S-4. Biodistribution investigation results.** (A) *In vivo* images of BALB/c mice after *i.v* injection of PBS (blank control group), cationic CBs and MM@CBs (100  $\mu$ L, 2 mg/mL MO) at 0.5, 1, 3, 6, 9 and 24 hr post-injection. (B) *Ex vivo* images of collected mice organs at 9 and 24 hr post-injection. Color scale ranges from  $3 \times 10^7$  to  $3 \times 10^8$  ( $\frac{p/sec/cm^2/sr}{\mu W/cm^2}$ ),  $n=3$ .

61 **8. DOX encapsulation efficacy investigation**

62 DOX concentration was analyzed using a fluorescence spectrometer (FP-8500, JASCO,  
63 Japan), excitation wavelength was set at 485 nm and the fluorescence intensity was detected at  
64 556.5 nm. The DOX concentration-fluorescence intensity was calibrated (0-10  $\mu$ M range).

65 The eluted free DOX solutions were diluted 6 times before fluorescence spectrometer  
66 measurement. The free DOX concentrations were calculated according to the calibration curve.  
67 The DOX encapsulation efficacy results are shown below.

68

69 **Table.S-2 DOX encapsulation efficacy result**

| <b>CB Formulation</b>                           | <b>Cationic CB + DOX</b> | <b>MM@CB +DOX</b> |
|-------------------------------------------------|--------------------------|-------------------|
| <b>Total DOX con. (<math>\mu</math>M)</b>       | 280.46                   | 233.72            |
| <b>Eluted Free DOX con. (<math>\mu</math>M)</b> | 22.65 $\pm$ 0.44         | 32.04 $\pm$ 0.19  |
| <b>Encapsulation Efficacy (%)</b>               | 91.93 $\pm$ 0.16         | 86.29 $\pm$ 0.08  |

70

71 9. Additional SAXS investigation results

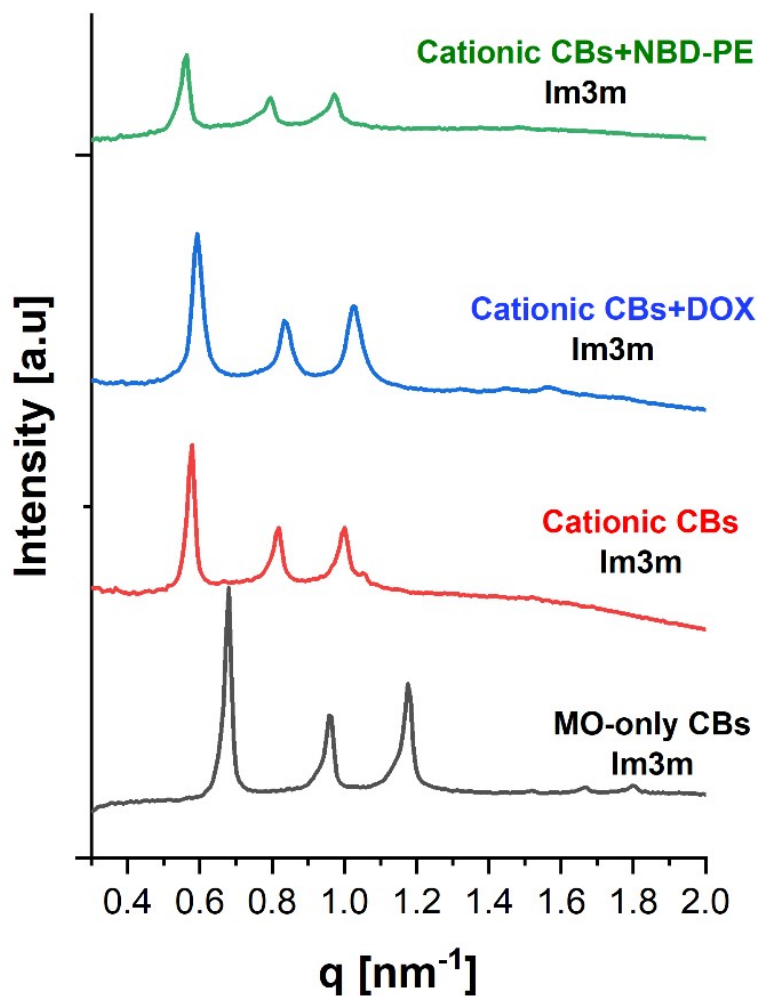

**Figure S-5. Additional SAXS patterns.** From bottom to top: MO-only CBs, cationic CBs, cationic CBs doped with 0.5 wt% DOX, and cationic CBs doped with 0.5 wt% NBD-PE. All the samples contain 20 mg/mL MO. Measurements were carried out at 37°C.

## 73 Reference

- 74 1. K. L. Von Eckardstein, S. Patt, C. Kratzel, J. C. W. Kiwit and R. Reszka, *Journal of Neuro-oncology*,  
75 2005, **72**, 209–215.
- 76 2. B. Angelov, A. Angelova, S. K. Filippov, G. Karlsson, N. J. Terrill, S. Lesieur and P. Štěpánek, *Journal*  
77 *of Physics. Conference Series*, 2012, **351**, 012004.
- 78 3. H. Kim, J. Sung, Y. Chang, A. Alfeche and C. Leal, *ACS Nano*, 2018, **12**, 9196–9205.
- 79 4. B. K. Yoo, R. Baskaran, T. Madheswaran, P. Sundaramoorthy and H. M. Kim, *International Journal of*  
80 *Nanomedicine*, 2014, 3119.
- 81 5. J. Zhai, F. Tan, R. B. Luwor, T. S. Reddy, N. Ahmed, C. J. Drummond and N. Tran, *ACS Applied Bio*  
82 *Materials*, 2020, **3**, 4198–4207.
- 83 6. S. Deshpande, E. Venugopal, S. V. Ramagiri, J. Bellare, G. Kumaraswamy and N. Singh, *ACS Applied*  
84 *Materials & Interfaces*, 2014, **6**, 17126–17133.
- 85 7. Y. Wei, J. Zhang, Y. Zheng, Y. Gong, F. Meng, C. Liu, L. Xu, C. C. Sun, Y. Gao and S. Qian, *RSC*  
86 *Advances*, 2019, **9**, 6287–6298.
- 87 8. T. Qiu, P. Gu, A. Wusiman, H. Ni, S. Xu, Y. Zhang, T. Zhu, J. He, Z. Liu, Y. Hu, J. Liu and D. Wang,  
88 *Colloids and Surfaces. B, Biointerfaces*, 2021, **204**, 111799.
- 89 9. R. Nisha, P. Kumar, U. Kumar, N. Mishra, P. Maurya, P. Singh, H. Tabassum, Alka, S. Singh, A. Guleria  
90 and S. A. Saraf, *International Journal of Pharmaceutics*, 2022, **622**, 121848.
- 91 10. S. Aleandri, D. Bandera, R. Mezzenga and E. M. Landau, *Langmuir*, 2015, **31**, 12770–12776.
- 92 11. M. Zabara, Q. Ren, H. Amenitsch and S. Salentinig, *ACS Applied Bio Materials*, 2021, **4**, 5295–5303.
- 93 12. Pramanik, Z. Xu, S. H. Shamsuddin, Y. S. Khaled, N. Ingram, T. Maisey, D. C. Tomlinson, P. L. Coletta,  
94 D. Jayne, T. Hughes, A. I. I. Tyler and P. A. Millner, *ACS Applied Materials & Interfaces*, 2022, **14**,  
95 11078–11091.
- 96 13. R. Nisha, P. Kumar, U. Kumar, N. Mishra, P. Maurya, S. Singh, P. Singh, A. Guleria, S. Saha and S. A.  
97 Saraf, *Molecular Pharmaceutics*, 2020, **18**, 1102–1120.
- 98 14. R. Petrilli, J. O. Eloy, F. S. G. Praça, J. O. Del Ciampo, M. C. A. Fantini, M. J. V. Fonseca and M. V. L.  
99 B. Bentley, *Journal of Biomedical Nanotechnology*, 2016, **12**, 1063–1075.
- 100 15. H. Wu, J. Li, Q. Zhang, X. Yan, L. Guo, X. Gao, M. Qiu, X. Jiang, R. Lai and H. Chen, *European*  
101 *Journal of Pharmaceutics and Biopharmaceutics*, 2012, **80**, 368–378.
- 102 16. Y. Tian, J. Li, J. Zhu, N. Zhu, H. Zhang, L. Liang and L. Sun, *Medical Science Monitor*, 2017, **23**, 2426–  
103 2435.
- 104 17. F. Hou, H. Wang, Y. Zhang, N. Zhu, H. Liu and J. Li, *Medical Science Monitor*,  
105 DOI:10.12659/msm.924620.
